# Supplementary material for: Extremely high color rendering white light from surface passivated carbon dots and Zn-doped AgInS2 nanocrystals
Source: Royal Society of Chemistry journal article supplement (doi:10.1039/c3tc32559h), 2014-01-01
Supplement: c3tc32559h1.pdf [file c3tc32559h1.pdf]

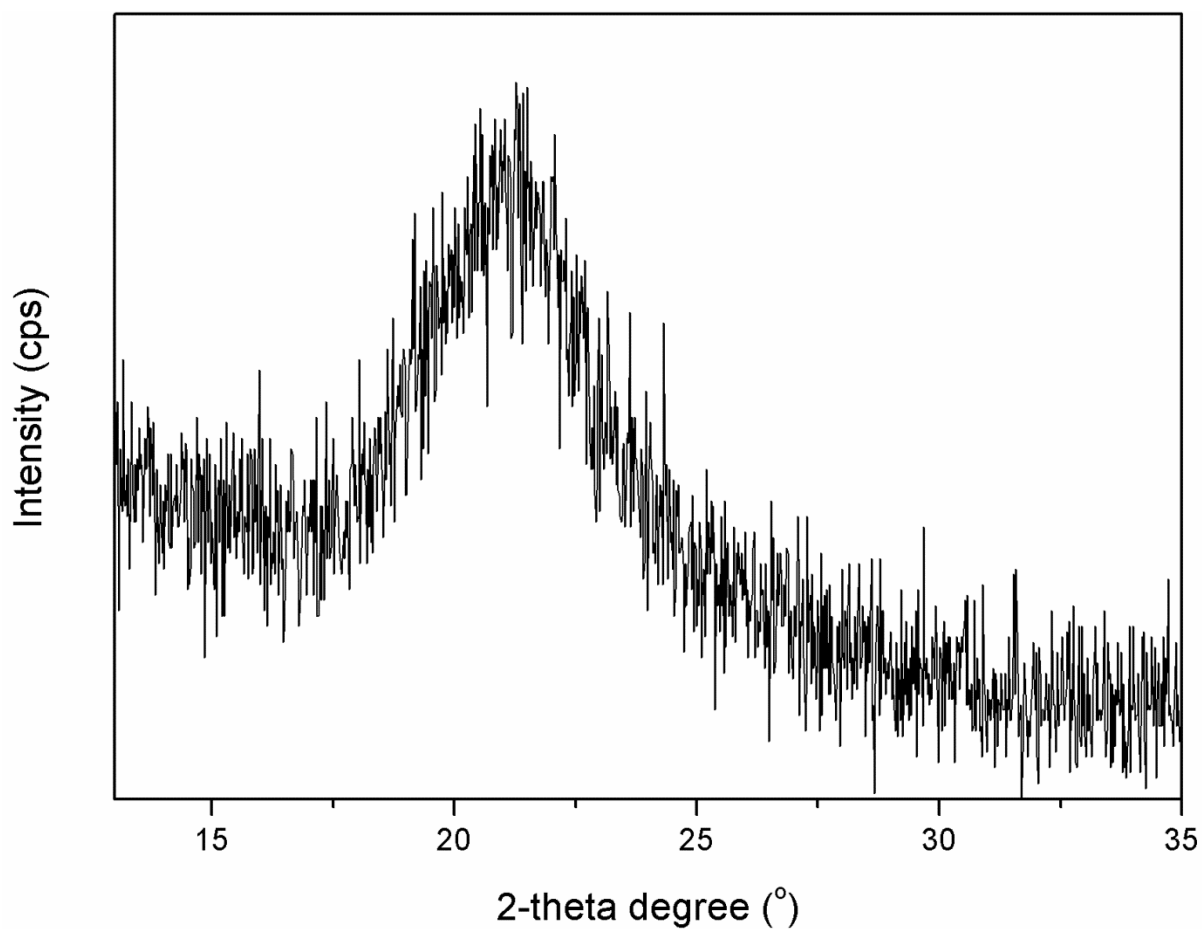

Figure S1. The powder XRD patterns of prepared HDA-capped carbon dots.

Furthermore, the X-ray diffraction (ATX-G, Rigaku, with Cu K $\alpha$  radiation) shown in figure S1, HDA-capped carbon dots showed the poor crystallization, and (002) interlayer spacing was 4.18 Å, which was larger than that of bulk graphite (3.3 Å) due to the introduction of oxygen containing functional groups [16].
